# Supplementary material
Source: PubMed Central journal article supplement (PMC6453234)
Supplement: ESO728854_supplementary_tables.pdf [file ESO728854_supplementary_tables.pdf]

**Supplementary information**

**Supplementary Table 1** Effect on sample size of individual and composite outcomes in lacunar and non-lacunar ischaemic stroke or both subtypes combined at 80% and 90% power.

|                                                                                          | Lacunar n=118 |           |           | Non-lacunar n=146 |           |           | All Ischaemic Stroke |           |           | Missing Data (%) |
|------------------------------------------------------------------------------------------|---------------|-----------|-----------|-------------------|-----------|-----------|----------------------|-----------|-----------|------------------|
|                                                                                          | N (%)         | 90% Power | 80% power | N (%)             | 90% Power | 80% power | n (%)                | 90% Power | 80% power |                  |
| Stroke                                                                                   | 10 (8%)       | 43038     | 32938     | 14 (10%)          | 37764     | 28208     | 24 (9%)              | 39918     | 29818     | 0                |
| TIA                                                                                      | 2 (2%)        | 260140    | 194320    | 4 (3%)            | 146310    | 109292    | 6 (2%)               | 182734    | 136498    | 0                |
| IHD in the year following the stroke (e.g. ongoing angina, or new myocardial infarction) | 14 (12%)      | 30184     | 22548     | 22 (15%)          | 22608     | 16888     | 36 (14%)             | 25918     | 19360     | 4                |
| Dementia                                                                                 | 1 (1%)        | 414454    | 309590    | 2 (1%)            | 275218    | 205582    | 3 (1%)               | 369492    | 276004    | 1                |
| Death                                                                                    | 2 (2%)        | 260140    | 194320    | 3 (2%)            | 200950    | 150106    | 5 (2%)               | 205284    | 153344    | 0                |
| mRS ≥3                                                                                   | 20 (17%)      | 19642     | 14672     | 33 (23%)          | 13868     | 10360     | 53 (20%)             | 16166     | 12076     | 0                |
| mRS ≥2                                                                                   | 47 (40%)      | 6234      | 4656      | 71 (49%)          | 4414      | 3298      | 118 (45%)            | 5172      | 3864      | 0                |
| ACE-R ≤ 82                                                                               | 14(22%)       | 14198     | 10606     | 15 (17%)          | 19504     | 14570     | 29 (19%)             | 16826     | 12570     | 57 (27%)         |
| Stroke or TIA                                                                            | 12 (10%)      | 35256     | 26336     | 18 (12%)          | 28732     | 21462     | 30 (11%)             | 31594     | 23600     | 0                |
| Stroke, TIA or IHD                                                                       | 25 (21%)      | 15030     | 11228     | 37 (25%)          | 11996     | 8962      | 62 (23%)             | 13264     | 9908      | 0                |
| Stroke, TIA, IHD or Death                                                                | 27 (23%)      | 13628     | 10180     | 39 (27%)          | 11158     | 8336      | 66 (25%)             | 12240     | 9144      | 0                |
| Stroke, TIA or death                                                                     | 14 (12%)      | 30184     | 22548     | 20 (14%)          | 25350     | 18936     | 34 (13%)             | 27458     | 20510     | 0                |

|                                                                                     |          |       |      |          |       |      |           |       |      |          |
|-------------------------------------------------------------------------------------|----------|-------|------|----------|-------|------|-----------|-------|------|----------|
| Stroke, TIA, death or mRS $\geq 3$                                                  | 29 (25%) | 12424 | 9282 | 44 (30%) | 9410  | 7030 | 73 (28%)  | 10654 | 7958 | 0        |
| Stroke, TIA, death or mRS $\geq 2$                                                  | 51 (43%) | 5442  | 4066 | 77 (53%) | 3774  | 2820 | 128 (48%) | 4466  | 3336 | 0        |
| Stroke, TIA, IHD, Death, or mRS $\geq 3$                                            | 39(33%)  | 10070 | 7522 | 57(39%)  | 6116  | 4568 | 96(36%)   | 5886  | 4398 | 0        |
| Stroke, TIA, IHD, Death, or mRS $\geq 2$                                            | 58(49%)  | 4174  | 3118 | 88(60%)  | 2852  | 2132 | 146(55%)  | 4184  | 3126 | 0        |
| Stroke, TIA, dementia, death mRS $\geq 3$ , or ACE-R $\leq 82$                      | 21 (33%) | 8194  | 6122 | 24 (27%) | 10900 | 8142 | 45 (30%)  | 9598  | 7170 | 31 (15%) |
| Stroke, TIA, ACE -R $\leq 82$ , dementia, death mRS $\geq 2$ , or ACE-R $\leq 82$ , | 33 (52%) | 3818  | 2852 | 43 (49%) | 4382  | 3274 | 76 (50%)  | 4136  | 3090 | 24 (11%) |
| Stroke, TIA, IHD, dementia, death, mRS $\geq 3$ or ACE-R $\leq 82$                  | 27 (43%) | 5504  | 4112 | 34 (39%) | 6512  | 4864 | 61 (40%)  | 6082  | 4128 | 29 (14%) |
| Stroke, TIA, IHD, dementia, death, mRS                                              | 38 (60%) | 2820  | 2106 | 51 (58%) | 3094  | 2312 | 89 (59%)  | 2976  | 2224 | 23 (11%) |

---

≥2 or ACE-  
R≤82

---

**End points which DO NOT include recurrent vascular events**

---

|                                     |          |       |       |          |       |       |          |       |       |          |
|-------------------------------------|----------|-------|-------|----------|-------|-------|----------|-------|-------|----------|
| ACE-R≤82 or dementia                | 14 (22%) | 14198 | 10606 | 15 (17%) | 19504 | 14570 | 29 (19%) | 16826 | 12570 | 55 (26%) |
| ACE-R≤82, dementia, death or mRS ≥3 | 19 (30%) | 9414  | 7032  | 18 (20%) | 15806 | 11806 | 37 (25%) | 12498 | 9336  | 35 (17%) |
| ACE-R≤82, dementia, death or mRS ≥2 | 33 (52%) | 3818  | 2852  | 41 (47%) | 4766  | 3560  | 74 (49%) | 4348  | 3248  | 28 (13%) |

---

|                                                                                          | Missing Data (%) | No that would need to be recruited to record outcome data on the no of patients calculated in Table S1 |        | No of patients with outcome if the last observation carried forward is used<br>n (%) | No of patients whose one year follow-up data would need to be recorded in order to detect a 10% reduction in outcome if LOCF was used |           | No of patients with missing data if LOCF was used (%) | No that would need to be recruited to for the no of patients followed up. |           |
|------------------------------------------------------------------------------------------|------------------|--------------------------------------------------------------------------------------------------------|--------|--------------------------------------------------------------------------------------|---------------------------------------------------------------------------------------------------------------------------------------|-----------|-------------------------------------------------------|---------------------------------------------------------------------------|-----------|
|                                                                                          |                  |                                                                                                        |        |                                                                                      | 90% Power                                                                                                                             | 80% Power |                                                       | 90% Power                                                                 | 80% power |
| Stroke                                                                                   | 0                | 39918                                                                                                  | 29818  | 24 (9%)                                                                              | 39918                                                                                                                                 | 29818     |                                                       | 39918                                                                     | 29818     |
| TIA                                                                                      | 0                | 182734                                                                                                 | 136498 | 6 (2%)                                                                               | 182734                                                                                                                                | 136498    |                                                       | 182734                                                                    | 136498    |
| IHD in the year following the stroke (e.g. ongoing angina, or new myocardial infarction) | 4                | 26998                                                                                                  | 20167  | 36 (14%)                                                                             | 25918                                                                                                                                 | 19360     |                                                       | 25918                                                                     | 19360     |
| Dementia                                                                                 | 1                | 373224                                                                                                 | 278792 | 3 (1%)                                                                               | 369492                                                                                                                                | 276004    |                                                       | 369492                                                                    | 276004    |
| Death                                                                                    | 0                | 205284                                                                                                 | 153344 | 5 (2%)                                                                               | 205284                                                                                                                                | 153344    |                                                       | 205284                                                                    | 153344    |
| mRS ≥3                                                                                   | 0                | 16166                                                                                                  | 12076  | 53 (20%)                                                                             | 16166                                                                                                                                 | 12076     |                                                       | 16166                                                                     | 12076     |
| mRS ≥2                                                                                   | 0                | 5172                                                                                                   | 3864   | 118 (45%)                                                                            | 5172                                                                                                                                  | 3864      |                                                       | 5172                                                                      | 3864      |
| ACE-R ≤ 82                                                                               | 57 (27%)         | 23049                                                                                                  | 17219  | 38(22%)                                                                              | 14350                                                                                                                                 | 10720     | 35(17%)                                               | 17289                                                                     | 12916     |
| Stroke or TIA                                                                            | 0                | 31594                                                                                                  | 23600  | 30 (11%)                                                                             | 31594                                                                                                                                 | 23600     |                                                       | 31594                                                                     | 23600     |
| Stroke, TIA or IHD                                                                       | 0                | 13264                                                                                                  | 9908   | 62 (23%)                                                                             | 13264                                                                                                                                 | 9908      |                                                       | 13264                                                                     | 9908      |
| Stroke, TIA, IHD or Death                                                                | 0                | 12240                                                                                                  | 9144   | 66 (25%)                                                                             | 12240                                                                                                                                 | 9144      |                                                       | 12240                                                                     | 9144      |
| Stroke, TIA or death                                                                     | 0                | 27458                                                                                                  | 20510  | 34 (13%)                                                                             | 27458                                                                                                                                 | 20510     |                                                       | 27458                                                                     | 20510     |
| Stroke, TIA, death or mRS≥ 3                                                             | 0                | 10654                                                                                                  | 7958   | 73 (28%)                                                                             | 10654                                                                                                                                 | 7958      |                                                       | 10654                                                                     | 7958      |

|                                                                    | Missing Data (%) | No that would need to be recruited to record outcome data on the no of patients calculated in Table S1 |      | No of patients with outcome if the last observation carried forward is used<br>n (%) | No of patients whose one year follow-up data would need to be recorded in order to detect a 10% reduction in outcome if LOCF was used |           | No of patients with missing data if LOCF was used (%) | No that would need to be recruited to for the no of patients followed up. |           |
|--------------------------------------------------------------------|------------------|--------------------------------------------------------------------------------------------------------|------|--------------------------------------------------------------------------------------|---------------------------------------------------------------------------------------------------------------------------------------|-----------|-------------------------------------------------------|---------------------------------------------------------------------------|-----------|
|                                                                    |                  |                                                                                                        |      |                                                                                      | 90% Power                                                                                                                             | 80% Power |                                                       | 90% Power                                                                 | 80% power |
| Stroke, TIA, death or mRS $\geq 2$                                 | 0                | 4466                                                                                                   | 3336 | 128 (48%)                                                                            | 4466                                                                                                                                  | 3336      |                                                       | 4466                                                                      | 3336      |
| Stroke, TIA, IHD, Death, or mRS $\geq 3$                           | 0                | 5886                                                                                                   | 4398 | 96(36%)                                                                              | 5886                                                                                                                                  | 4398      |                                                       | 5886                                                                      | 4398      |
| Stroke, TIA, IHD, Death, or mRS $\geq 2$                           | 0                | 4184                                                                                                   | 3126 | 146(55%)                                                                             | 4184                                                                                                                                  | 3126      |                                                       | 4184                                                                      | 3126      |
| Stroke, TIA, dementia, death mRS $\geq 3$ , or ACE-R $\leq 82$     | 31 (15%)         | 11292                                                                                                  | 8435 | 74(40%)                                                                              | 6182                                                                                                                                  | 4618      | 21(11%)                                               | 6946                                                                      | 5189      |
| Stroke, TIA, dementia, death mRS $\geq 2$ , or ACE-R $\leq 82$ ,   | 24 (11%)         | 4647                                                                                                   | 3472 | 112(68%)                                                                             | 2070                                                                                                                                  | 1546      | 16(8%)                                                | 2250                                                                      | 1680      |
| Stroke, TIA, IHD, dementia, death, mRS $\geq 3$ or ACE-R $\leq 82$ | 29 (14%)         | 7072                                                                                                   | 4800 | 92(48%)                                                                              | 4518                                                                                                                                  | 3374      | 19(9%)                                                | 4965                                                                      | 3708      |

|                                                                    | Missing Data (%) | No that would need to be recruited to record outcome data on the no of patients calculated in Table S1 |       | No of patients with outcome if the last observation carried forward is used<br>n (%) | No of patients whose one year follow-up data would need to be recorded in order to detect a 10% reduction in outcome if LOCF was used |           | No of patients with missing data if LOCF was used (%) | No that would need to be recruited to for the no of patients followed up. |           |
|--------------------------------------------------------------------|------------------|--------------------------------------------------------------------------------------------------------|-------|--------------------------------------------------------------------------------------|---------------------------------------------------------------------------------------------------------------------------------------|-----------|-------------------------------------------------------|---------------------------------------------------------------------------|-----------|
|                                                                    |                  |                                                                                                        |       |                                                                                      | 90% Power                                                                                                                             | 80% Power |                                                       | 90% Power                                                                 | 80% power |
| Stroke, TIA, IHD, dementia, death, mRS $\geq 2$ or ACE-R $\leq 82$ | 23 (11%)         | 3344                                                                                                   | 2499  | 126(65%)                                                                             | 2340                                                                                                                                  | 1748      | 15(7%)                                                | 2516                                                                      | 1880      |
| <b>End points which DO NOT include recurrent vascular events</b>   |                  |                                                                                                        |       |                                                                                      |                                                                                                                                       |           |                                                       |                                                                           |           |
| ACE-R $\leq 82$ or dementia                                        | 55(26%)          | 22738                                                                                                  | 16986 | 31(18%)                                                                              | 18386                                                                                                                                 | 13734     | 34(16%)                                               | 21888                                                                     | 16350     |
| ACE-R $\leq 82$ , dementia, death or mRS $\geq 3$                  | 35 (17%)         | 15058                                                                                                  | 11248 | 63(34%)                                                                              | 7944                                                                                                                                  | 5934      | 24(11%)                                               | 8926                                                                      | 6667      |
| ACE-R $\leq 82$ , dementia, death or mRS $\geq 2$                  | 28(13%)          | 4998                                                                                                   | 3733  | 107(57%)                                                                             | 3204                                                                                                                                  | 2394      | 19(9%)                                                | 3521                                                                      | 2631      |
